# Supplementary material for: Signaling mechanism for modulation by ATP of glycine receptors on rat retinal ganglion cells
Source: PubMed Central journal article supplement (PMC4928062; doi:10.1038/srep28938), 2016-06-30
Supplement: srep28938-s1.pdf [file srep28938-s1.pdf]

1 **Signaling mechanism for modulation by ATP of glycine receptors on rat retinal**  
2 **ganglion cells**

3

4 Ping-Ping Zhang, Gong Zhang, Wei Zhou, Shi-Jun Weng, Xiong-Li Yang and  
5 Yong-Mei Zhong

6 Institutes of Brain Science, State Key Laboratory of Medical Neurobiology and  
7 Collaborative Innovation Center for Brain Science, Fudan University, 138 Yixueyuan  
8 Road, Shanghai 200032, China.

9

10 **Fig. S1.**

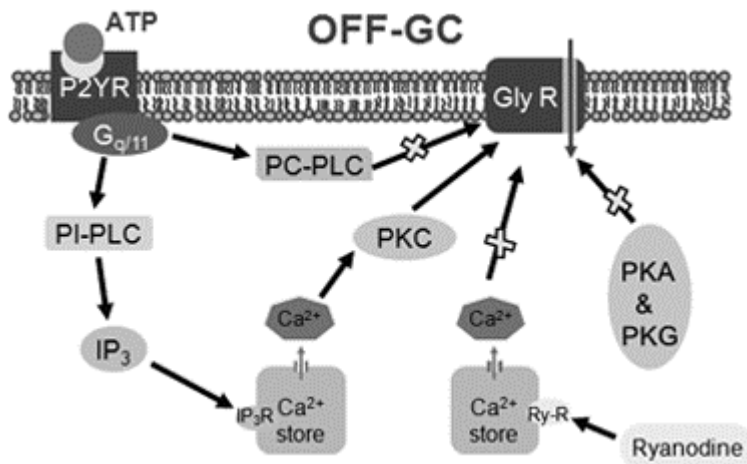

11

12

13 **Fig. S1. Schematic diagram showing the signaling pathway that mediates the**

14 **suppression by ATP of glycine currents in rat retinal OFF-GCs. By activating**

15  $G_{q/11}$ -coupled  $P2Y_1$  and  $P2Y_{11}$ , ATP suppresses glycine currents via a distinct

16 intracellular PI-PLC/ $IP_3$ / $Ca^{2+}$ /PKC signaling pathway. Note that cAMP-PKA and

17 cGMP-PKG signaling pathways are not involved in the effect. GlyR, glycine receptor;

18  $IP_3$ : inositol 1,4,5-trisphosphate;  $IP_3R$ :  $IP_3$  receptor; OFF-GC: OFF type ganglion cell;

19  $P2YR$ ,  $P2Y$  receptor; PC-PLC: phosphatidylcholine-specific phospholipase C;

20 PI-PLC: phosphatidylinositol-specific phospholipase C; PKA: protein kinase A; PKC:

21 protein kinase C; PKG: protein kinase G; Ry-R: ryanodine receptor.

22

23

24

25 **Fig. S2.**

26

27

28

29

30

31

32

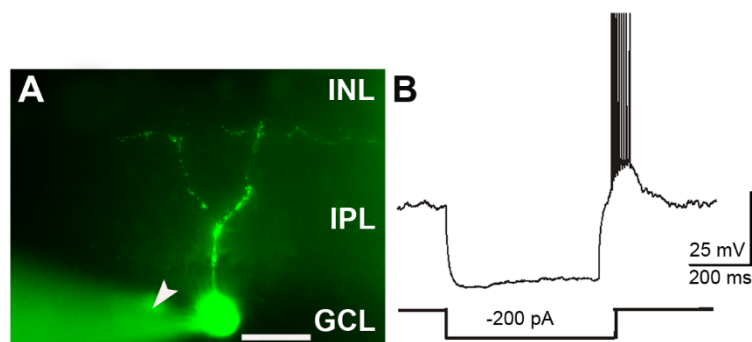

33 **Fig. S2. A rat OFF type ganglion cell (OFF-GC).** (A) Fluorescence image of a  
34 Lucifer yellow-filled OFF-GC, which possesses dendrite arborization in the distal part  
35 of the IPL. The arrowhead points to the recording pipette. INL, inner nuclear layer;  
36 IPL, inner plexiform layer; GCL, ganglion cell layer. Scale bar = 20  $\mu\text{m}$ . (B) Voltage  
37 response of the cell to a 500 ms negative current step. Note the rebound burst firing at  
38 the offset of the current injection.

39
